# Supplementary material
Source: publisher site journal article supplement (http://www.degruyter.com/publication/journal_key/IJB/downloadAsset/IJB_Vancouver%20Reference%20Style%20Sheet.pdf)
Supplement: Supplementary file 1 [file IJB_Vancouver%20Reference%20Style%20Sheet.pdf]

# REFERENCE STYLE VANCOUVER

Full guide

## In-text citation

### Single reference

[1]

### Series of references

[2, 8, 25]

### Range of references

[5–12]

### Citation order

Sequential

## Reference type

### Issue number

Not included

### Author initials

Abbreviated without dot and unspaced

### Reference list label/order

Numbered without bracket

### Journal

1. Raustorp A, Mattsson E, Svensson K, Costa PT Jr. Physical activity, body composition and physical self-esteem: a 3-year follow-up study among adolescents in Sweden. *Scand J Med Sci Sports* 2006;16:258–66.

### Journal with supplement/article number

2. Sallis JF, Saelens BE. Assessment of physical activity by self-report: status, limitations, and future directions. *Res Q Exerc Sport* 2000;71(2 Suppl):S1–14.

### et al. usage

(more than 6 authors = 6 authors + et al.);

4. Kaye K, Day RD, Hair EC, Moore KA, Hadley AM, Teixeira PJ, et al. Parent marital quality and the parent-adolescent relationship: effects on sexual activity among adolescents and youth. *Marriage Fam Rev* 2009;45:270–88.

### Epub ahead of print (DOI)

5. Mason EB, Burkhart K, Lazebnik R. Adolescent stress management in a primary care clinic. *J Pediatr Health Care* 2018 Sep 3. <https://doi.org/10.1016/j.pedhc.2022.05.019> [Epub ahead of print].

### Journal – in press/forthcoming

6. Tappy L, Lara KA. Metabolic effects of fructose and the worldwide increase in obesity. *Physiol Rev*, in press.

**Book/monograph**

7. Shek DTL, Sun RCF, Merrick J. University and college students. Health and development issues for the leaders of tomorrow. New York: Nova Science; 2013.

**Book with edition**

8. Joannopoulos JD, Johnson SG, Winn JN, Meade RD. Photonic crystals: molding the flow of light, 2nd ed. Princeton, NJ: Princeton University Press; 2008:350 p.

**Edited book**

9. Shek DTL, Ma C, Yu L, Merrick J, editors. Human developmental research. Experience from research in Hong Kong. New York: Nova Science; 2014.

**Edited book with chapter title (and editors)**

10. Halpen-Felsher BL, Morrell HE. Preventing and reducing tobacco use. In: Berlan ED, Bravender T, editors. Adolescent medicine today: a guide to caring for the adolescent patient [Internet]. Singapore: World Scientific Publishing Co.; 2012.

**Book series**

11. Forghieri F, Tkach RW, Chraplyvy AR. Optical fiber telecommunications, Kaminov IP, Koch TL, editors. San Diego, CA: Academic; 1997, vol IIIA.

**Proceedings/Conferences**

12. Musaka K, Akasaka Y, Suzuki Y, Kamiya T. Novel network fiber to manage dispersion at 1.55  $\mu\text{m}$  with combination of 1.3  $\mu\text{m}$  zero dispersion single mode fiber. In: Proceedings of the symposium on robotics, mechatronics and animatronics in the creative and entertainment industries and arts. SSAISB 2005. University of Hertfordshire, Hatfield, UK; 2005.

**Electronic publications with DOI**

13. IASO. Epidemiology of childhood overweight & obesity in India: a systematic review. International Association for the Study of Obesity; 2012. Available from: <http://www.iaso.org/iotf/obesity/obesitytheglobalepidemic>

**Electronic publications without DOI**

14. IPAQ Group. Guidelines for data processing and analysis of the international physical activity questionnaire (IPAQ) – short and long forms [Online]. Available from: <https://sites.google.com/site/theipaq/scoring-protocol> [Accessed 4 Apr 2013].

[For all documents on the web that do not have a DOI, a URL and access date must be provided.]

**Thesis/Dissertation**

15. Cotruvo, J. Kinetic model for chlorophyll degradation [Ph.D. thesis]. Cambridge, MA: Massachusetts Institute of Technology; 1996.

**Report**

16. Rowe IL, Carson NE. Medical manpower in Victoria. East Bentleigh (AU): Monash University, Department of Community Practice; 1981. 35 p., Report No. 4.

**Patent**

17. Pagedas AC. Flexible endoscopic grasping and cutting device and positioning tool assembly. United States patent 20020103498, 2002.

**Standards**

18. Frequency response and bias, NERC Reliability Standard BAL-003-0.1b, May 2009 [Online]. Available from: [http://www.nerc.com/files/BAL-003-0\\_1b.pdf](http://www.nerc.com/files/BAL-003-0_1b.pdf)

**Corporate publication**

3. WHO. The diagnosis and management of non-alcoholic fatty liver disease: practice guideline by the American Association for the Study of Liver Diseases, American College of Gastroenterology, and the American Gastroenterological Association. *Hepatology* 2012;55:2005–23.
